# Supplementary material for: Mycovirus Hunting Revealed the Presence of Diverse Viruses in a Single Isolate of the Phytopathogenic Fungus Diplodia seriata From Pakistan
Source: PubMed Central journal article supplement (PMC9277117; doi:10.3389/fcimb.2022.913619), 2022-06-29
Supplement: DataSheet_1.pdf [file DataSheet_1.pdf]

## Supplementary information for

### **Mycovirus hunting revealed the presence of diverse viruses in a single isolate of the phytopathogenic fungus *Diplodia seriata* from Pakistan**

Haris Ahmed Khan<sup>1</sup>, Paul Telengech<sup>2</sup>, Hideki Kondo<sup>2</sup>, Muhammad Faraz Bhatti<sup>1\*</sup>, Nobuhiro Suzuki<sup>2\*</sup>

1. Atta-ur-Rahman School of Applied Biosciences (ASAB), National University of Sciences and Technology (NUST), H-12, 44000, Islamabad, Pakistan.

2. Institute of Plant Science and Resources, Okayama University, Kurashiki, 710-0046, Japan.

#### **Running title: Virome of a Pakistani isolate of *Diplodia seriata***

\*Corresponding authors

Nobuhiro Suzuki

Institute of Plant Science and Resources, Okayama University, Kurashiki, 710-0046, Japan.

e-mail: [nsuzuki@okayama.u-ac.jp](mailto:nsuzuki@okayama.u-ac.jp)

Muhammad Faraz Bhatti

Atta-ur-Rahman School of Applied Biosciences (ASAB), National University of Sciences and Technology (NUST), H-12, 44000, Islamabad, PAKISTAN.

e-mail: [mfbhatti@asab.nust.edu.pk](mailto:mfbhatti@asab.nust.edu.pk)

**Supplementary Figures: 8**

**Supplementary Table : 1**

## Supplementary Figures

**Supplementary Figure 1.** Phylogenetic analysis of isolate L3 (*Diplodia seriata*) utilizing its internal transcribed spacer sequence (ITS) and other isolates within the genera *Diplodia* and *Botryosphaeria*. A maximum-likelihood tree was constructed with a best fit model using 1000 bootstrap value replicates. Values less than 500 were masked and the tree was visualized using an online version of iTOLL (ver. 6.0) (see Materials and Methods). The position of L3 is indicated by the red arrow.

**Supplementary Figure 2.** Molecular features of *Diplodia seriata* chrysovirus 1 (DsCV1). (A) A sequence comparison of the terminal untranslated regions (UTRs) of all four genomic segments (dsRNA1 to dsRNA4). The 5'-terminal sequence 5'-UGAUAAAAA---3' was conserved among all three completely sequenced segments. The 5' terminal of dsRNA3 could not be determined *via* RACE. The 3'-terminal sequence 5'---CCUUUAGUAGU-3' was found strictly conserved. (B) Conserved motifs in the RdRP domain of DsCV1 and other chrysoviruses. A total of eight conserved motifs (I-VIII) were observed. Asterisks (\*) indicate identical amino acid residues, “:” and “.” indicate conserved and semi-conserved amino acid residues. The level of conservation is shown above the aligned sequences as rectangles (silver color). The RdRP conserved motifs are shown in the same manner with the same symbols in the subsequent figures. Abbreviations of viruses utilized in this study are as follows: *Diplodia seriata* chrysovirus 1 (DsCV1; OM837790) *Fusarium oxysporum* f. sp. *dianthi* mycovirus 1 (FodV1; YP 009158913.1), *Fusarium graminearum* mycovirus China 9 (FgV-ch9; ADU54123.1), *Fusarium graminearum* dsRNA mycovirus 2 (FgV2; ADW08802.1), *Botryosphaeria dothidea* chrysovirus 1 (BdCV1; ARE59228.1), *Tolyposcladium cylindrosporum* virus 2 (ToCV2; CBY84993.1), *Aspergillus mycovirus* 1816 (AsV1816; ABX79996.1), *Amasya cherry disease associated chrysovirus* (ACDCV; CAG77602.1), *Fusarium oxysporum* chrysovirus 1 (FoCV1; YP 009665200.1), *Cryphonectria nitschkei* chrysovirus 1 (CnV1; BBJ21307.1), *Penicillium chrysogenum* virus (PcV; YP 392482.1), *Cryphonectria nitschkei* chrysovirus 1 (CnV1; BBJ21307.1).

**Supplementary Figure 3.** Molecular features of *Diplodia seriata* polymycovirus 1 (DsPmV1). (A) Terminal sequences of the DsPmV1 genomic segments (dsRNA1 to dsRNA4). The 5'-CGAUUAAAACUU---3' was conserved among all segments. The 3' tetra-nucleotide 5'---GGGG-3' sequence was found conserved. (B) Conserved motifs in RdRP domain of DsPmV1 and other polymycoviruses. The viruses included in the analyses are: *Diplodia seriata* polymycovirus 1 (DsPmV1; OM837794) *Plasmopara viticola* lesion associated polymycovirus 1 (PvaPmV1; QHG11067.1), *Beauveria bassiana* polymycovirus 2 (BbPmV2; CUS18599.1), *Magnaporthe oryzae* polymycovirus 1 (MoPmV1; QAU09249.1), *Aspergillus fumigatus* polymycovirus 1 (AfuPmV1; YP 009551547.1), *Botryosphaeria dothidea* virus 1 (BdRV1; YP 009342446.1), *Penicillium janthinellum* polymycovirus 1 (PjPmV1; BCJ03666.1), *Colletotrichum camelliae* filamentous virus 1 (CcFV-1; ASV63092.1).

**Supplementary Figure 4.** Genomic terminal sequences and RdRP motifs of *Diplodia seriata* partitivirus 1 (DsPV1). (A) Comparison of the terminal sequences of DsPV1 with *Metarhizium brunneum* partitivirus 1 (MbPV1) (accession no. QHB49873.1). The 5' penta- and 3' deca-nucleotides, 5'-CCCAA---3' and 5'---CCCCUUGGGG-3', were conserved between the two partitiviruses. (B) Conserved motifs in the RdRP domain of DsPV1 and other partitiviruses. The viruses included in the analyses are: *Diplodia seriata* partitivirus 1 (DsPV1; OM837798), *Metarhizium brunneum* partitivirus 1 (MbPV1; QHB49873.1), *Beauveria bassiana* partitivirus 3 (BbPV3; QFP40245.1), *Colletotrichum eremochloae* partitivirus 1 (CePV1; AZT88590.1), *Rhizoctonia solani* partitivirus virus 5 (RsPV5; AZQ25369.1), *Beihai barnacle* virus 12 (BbV12; YP 009333370.1).

**Supplementary Figure 5.** Molecular features of *Diplodia seriata* victorivirus 1 (DsVV1). (A) Alignment of the terminal sequences of DsVV1 with *Magnaporthe oryzae* virus 2 (MoV2; LC573906.1) and *Sphaeropsis sapinea* RNA virus 2 (SsRV2; AF039080.1). No conservation was observed at the 5' terminal region among the three closely related viruses, while the tetra-nucleotide, 5'-GAUA---3' is shared by DsVV1 and MoV2. The 3' penta-nucleotide 5'---AAUGC-3' was conserved among the three viruses. (B)

RdRP conserved motifs of DsPV1 and other victoriviruses. The viruses included in the analyses are: *Diplodia seriata* victorivirus 1 (DsVV1; OM837800) *Neofusicoccum parvum* victorivirus 1 (NpVV1; QTE76048.1), *Rosellinia necatrix* victorivirus 1 (RnVV1; YP 008130308.1), *Ustilagoidea vires* RNA virus 1 (UvRV1; YP 007761589.1), *Macrophomina phaseolina* victorivirus 2 (MpVV2; QKO02072.1), *Phomopsis longicolla* totivirus 1 (PITV1; ALD89108.1), *Alternaria arborescens* victorivirus 1 (AbVV1; YP 009553478.1), *Coniothyrium minitans* RNA virus (CmRV; YP 392467.1), *Penicillium digitatum* virus 1 (PdV1; AMY26886.1), *Magnaporthe oryzae* virus 2 (MoV2; BBG92298.1), *Sphaeropsis sapinea* RNA virus 2 (SsRV2; NP 047560.1), *Macrophomina phaseolina* victorivirus 2 (MpVV2; QKI37143.1), *Neofusicoccum parvum* victorivirus 2 (NpVV2; QTE76050.1).

**Supplementary Figure 6.** Genomic terminal sequences and RdRP motifs of *Diplodia seriata* splipalmiviruses 1 (DsSpV1). (A) A comparison of the untranslated regions (UTRs) of the DsSpV1. The genomic segments RNA1 and RNA2 have relatively well-conserved nucleotides at both termini. DsSpV1 RNA3 remained undetermined. (B) Conserved motifs in RdRP domain of DsSpV1, other splipalmiviruses and narna-like viruses. The viruses included in the analyses of motifs G, F, A and B are: *Diplodia seriata* splipalmivirus 1 (DsSpV1; OM837803) *Erysiphe necator* associated narnavirus 4 (EnNV4; QJT93743.1), *Aspergillus fumigatus* narnavirus 1 (AfuNV1; AXE72933.1), *Neofusicoccum parvum* narnavirus 2 (NpNV2; QDB74995.1), *Aspergillus flavus* narnavirus 1 (AfuNV1; UAW09567.1), *Cryphonectria naterciae* splipalmivirus 1 (CnSpV1; BCX55509.1), *Magnaporthe oryzae* narnavirus 1 (MoNV1; QJV68034.1), *Oidiodendron maius* splipalmivirus 1 (OmSpV1; QNN89179.1), *Plasmopara viticola* lesion associated narnavirus 20 (PvlnNV20; QIR30299.1), *Neofusicoccum parvum* narnavirus 3 (NpNV3; QTE76053.1), *Aspergillus fumigatus* narnavirus 2 (AfuNV2; BCH36622.1). The viruses included in the analyses of motifs C and D are: *Diplodia seriata* splipalmivirus 1 (DsSpV1; OM837804) *Cryphonectria naterciae* splipalmivirus 1 (CnSpV1; BCX55510.1), *Magnaporthe oryzae* narnavirus 1 (MoNV1; BCH36655.1), *Oidiodendron maius* splipalmivirus 1 (OmSpV1; QNN89180.1), *Botrytis cinerea* binarnavirus 2 (BcBNV2; QLF49184.1), *Aspergillus fumigatus* narnavirus 2a (AfuNV2a; BCH36634.1), *Aspergillus fumigatus* narnavirus 2b (AfuNV2b; BCH36628.1), *Aspergillus fumigatus* narnavirus 2c (AfuNV2c; BCH36623.1), *Aspergillus flavus* narnavirus 1 (AfuNV1; UAW09566.1), *Sclerotinia sclerotiorum* narnavirus 2 (SsNV2; QZE12027.1).

**Supplementary Figure 7.** Molecular features of *Diplodia seriata* botourmiavirus 1 and 2 (DsBOV1 and 2). (A). A comparison of the terminal sequences of the DsBOV2 genomic RNA with that of *Neofusicoccum parvum* ourmia-like virus 1 (NpBOV1; MK584837.1). The viruses share high levels of nucleotide conservation. (B) Conserved RdRP motifs of DsBOV1 and 2 with other botourmiaviruses. The viruses included in the analyses are: *Diplodia seriata* botourmiavirus 1 (DsBOV1; OM837801), *Diplodia seriata* botourmiavirus 2 (DsBOV2; OM837802) *Epicoccum nigrum* ourmia-like virus 2 (EnOulV2; QDB75005.1), *Aspergillus neoniger* ourmia-like virus 1 (AnOLV1; AZT88620.1), *Pyricularia oryzae* ourmia-like virus 1 (PoOLV1; BBF90576.1), *Phomopsis longicolla* RNA virus 1 (PIRV1; YP 009345044.1), *Sclerotinia sclerotiorum* ourmia-like virus 1 (SsOLV1; ALD89138.1), *Rhizoctonia solani* ourmia-like virus 1 (RsOLV1; YP 010084710.1), *Magnaporthe oryzae* ourmia-like virus (MOLV; SBQ28480.1), Soybean leaf-associated ourmiavirus 2 (SLOV2; ALM62250.1).

**Supplementary Figure 8.** Molecular features of *Diplodia seriata* RNA virus 1 (DsRV1). (A) Four transmembrane helices domains predicted at N-terminus of the ORF1 using the TMHMM - 2.0 web server. (B) Conserved motifs in RdRP domain of DsRV1 other members of the proposed family Ambiguiviridae. Four conserved motifs (IV-VIII) were observed. The viruses included in the analyses are: *Diplodia seriata* RNA virus 1 (DsRV1; OM837806), *Phoma matteucciicola* RNA virus 1 (PmRV1; QNC69246.1), *Periconia macrospinos* ambiguvirus 1 (PmAV1; AZT88666.1), *Diaporthe ambigua* RNA virus 1 (DaRV1; NP\_037581.1), *Magnaporthe oryzae* RNA virus (MoRV; QVU39989.1), *Erysiphe necator* associated ambiguvirus 1 (EnAV1; QKN22641.1).

Fig. S1

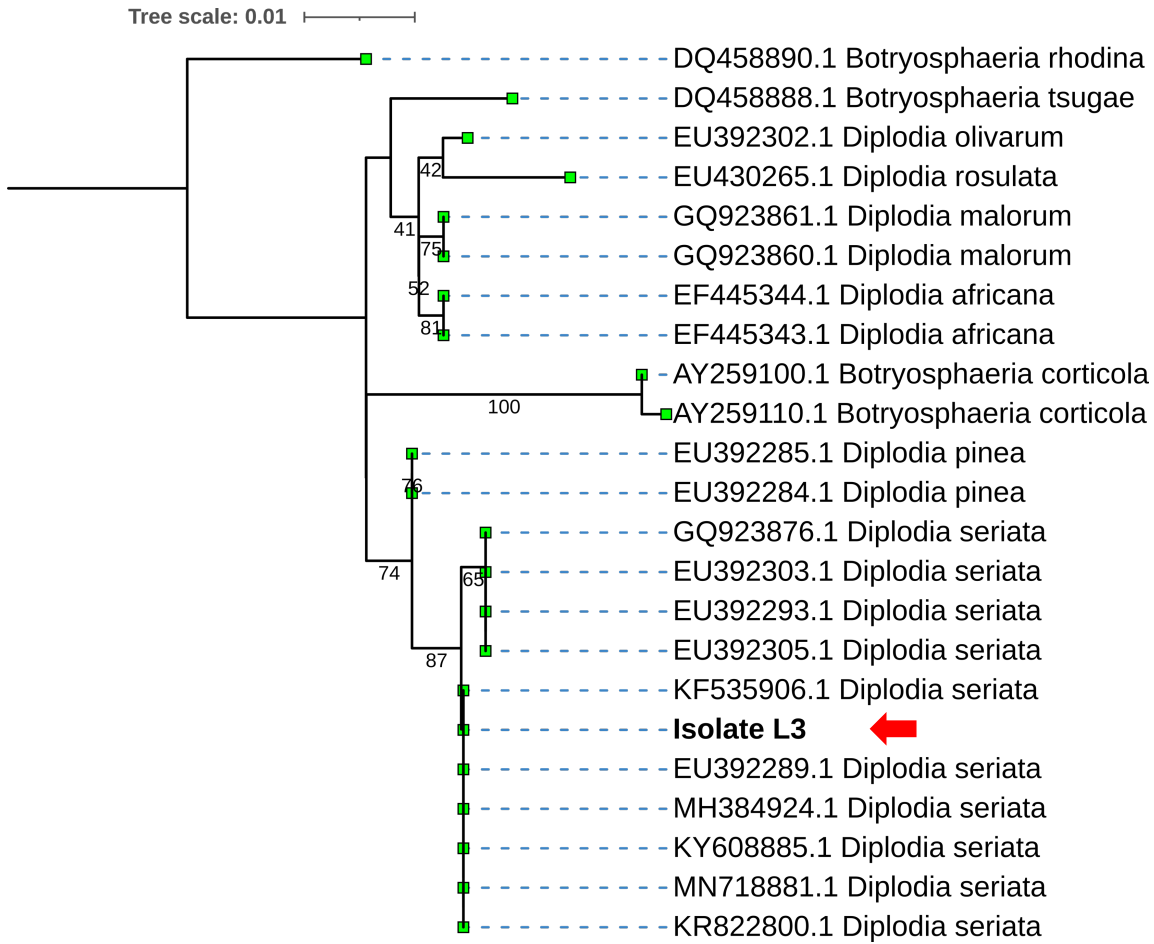

Fig. S2

A

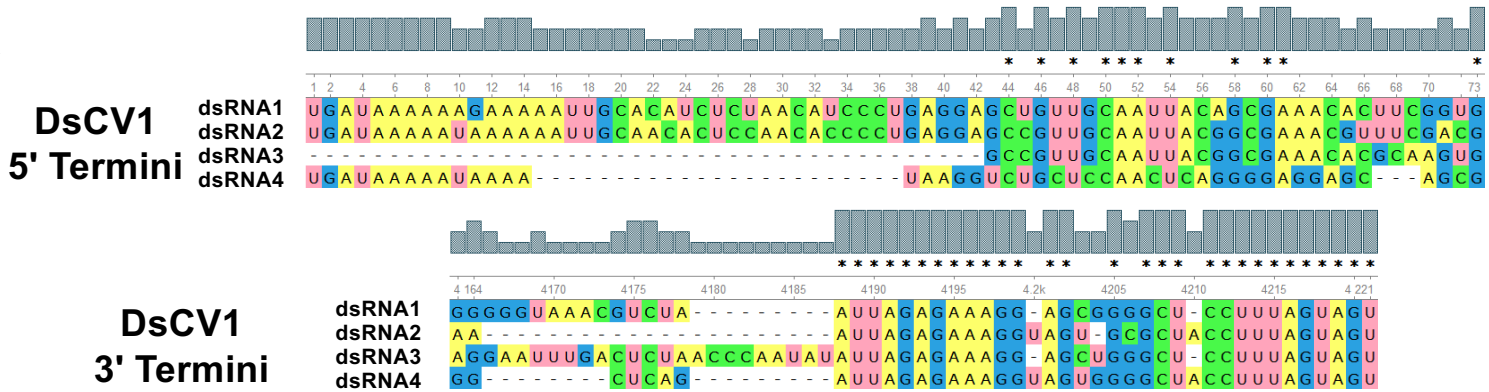

B

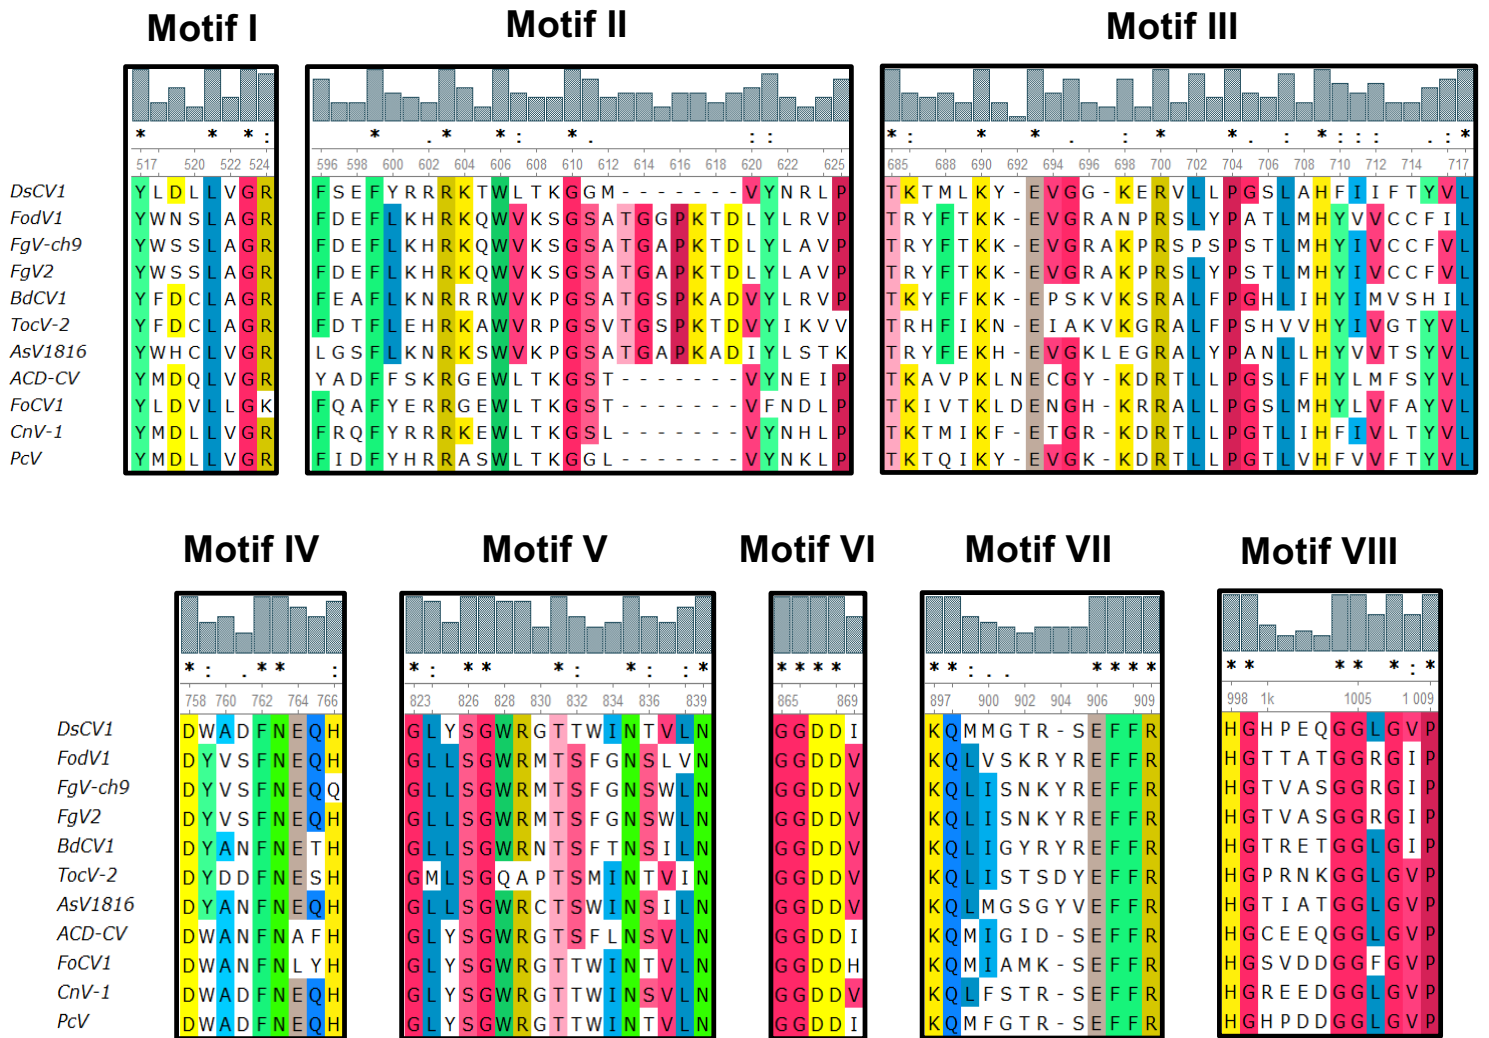

Fig. S3

A

DsPmV1 5' Termini

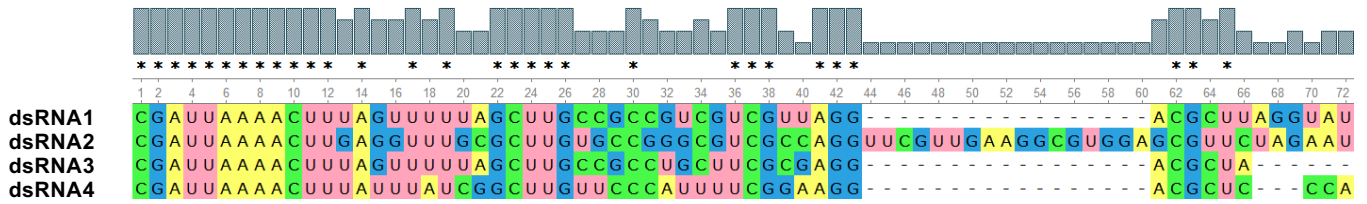

DsPmV1 3' Termini

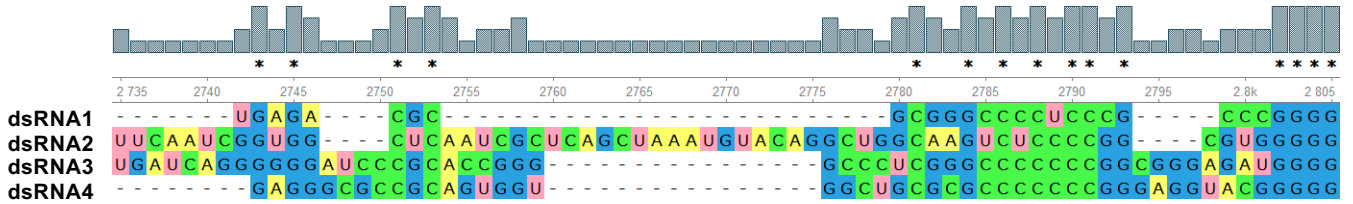

B

Motif IV

Motif V

Motif VI

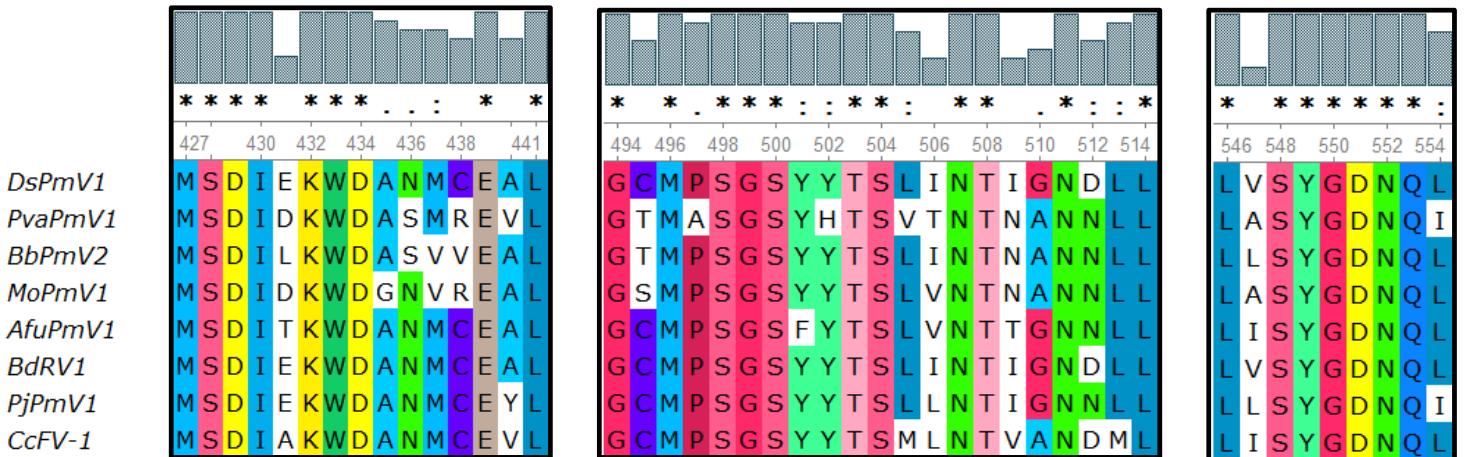

Fig. S4

A

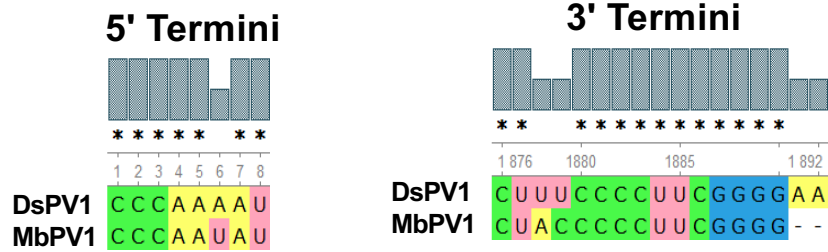

B

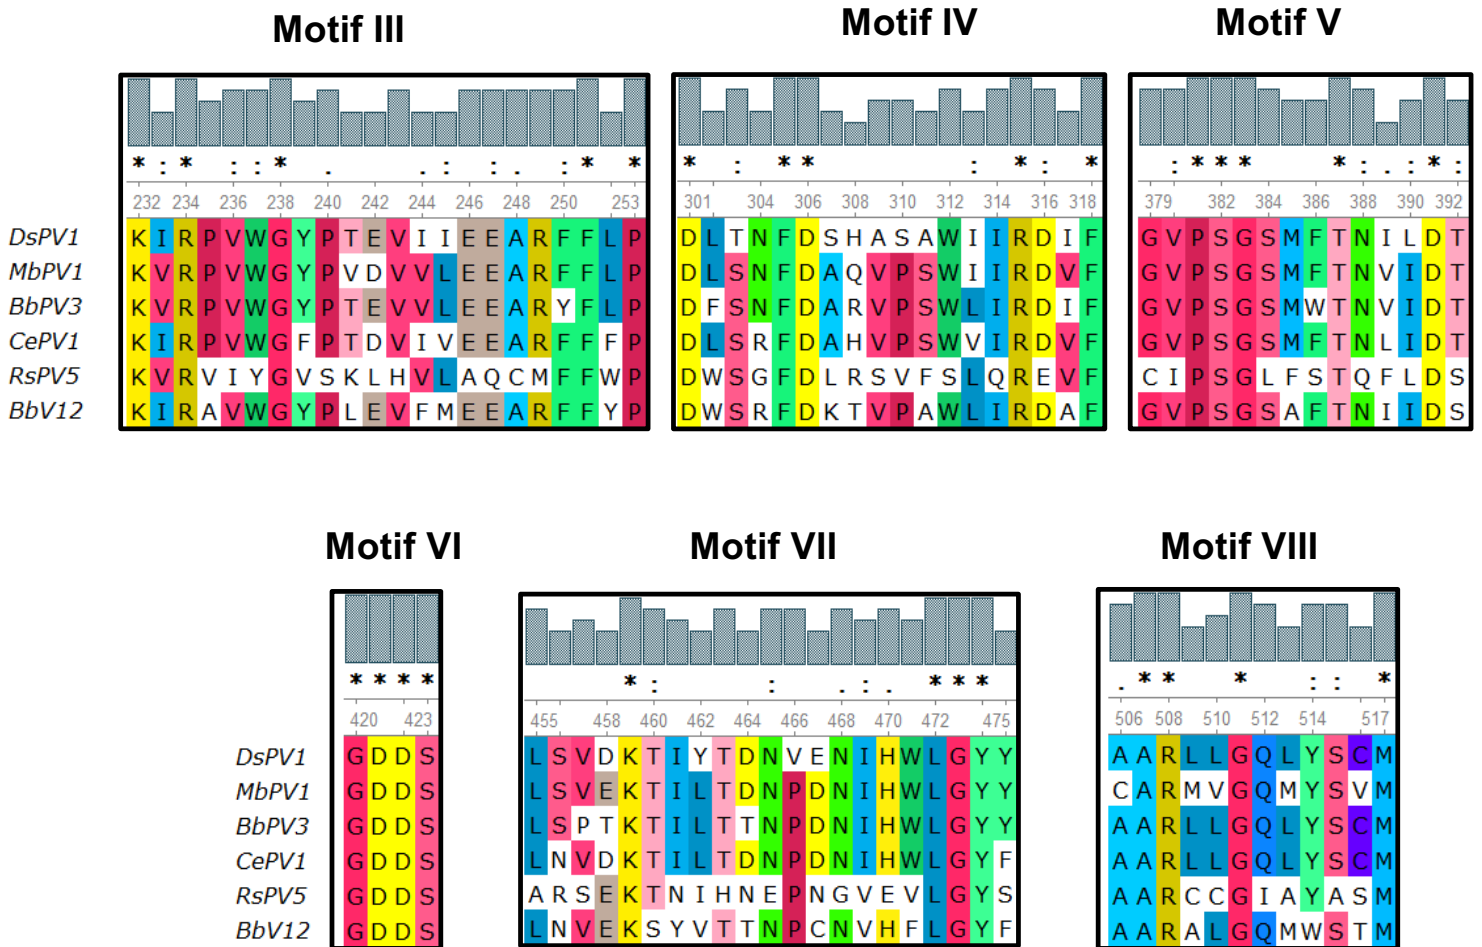

Fig. S5

DsVV1 5' Termini

A

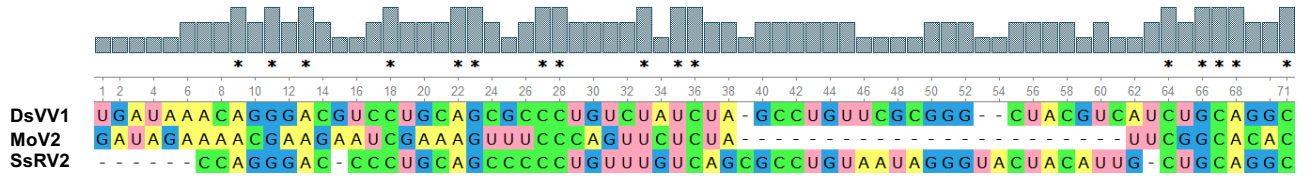

DsVV1 3' Termini

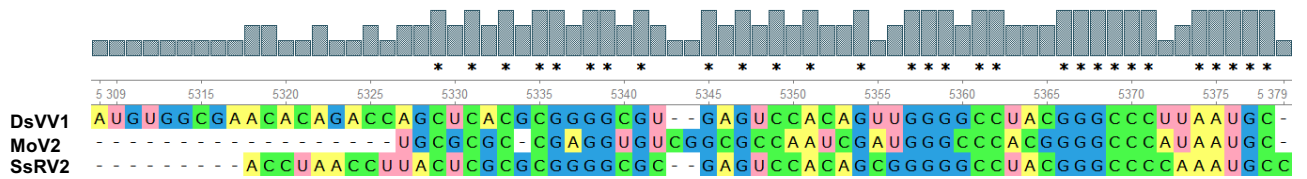

B

Motif I

Motif II

Motif III

Motif IV

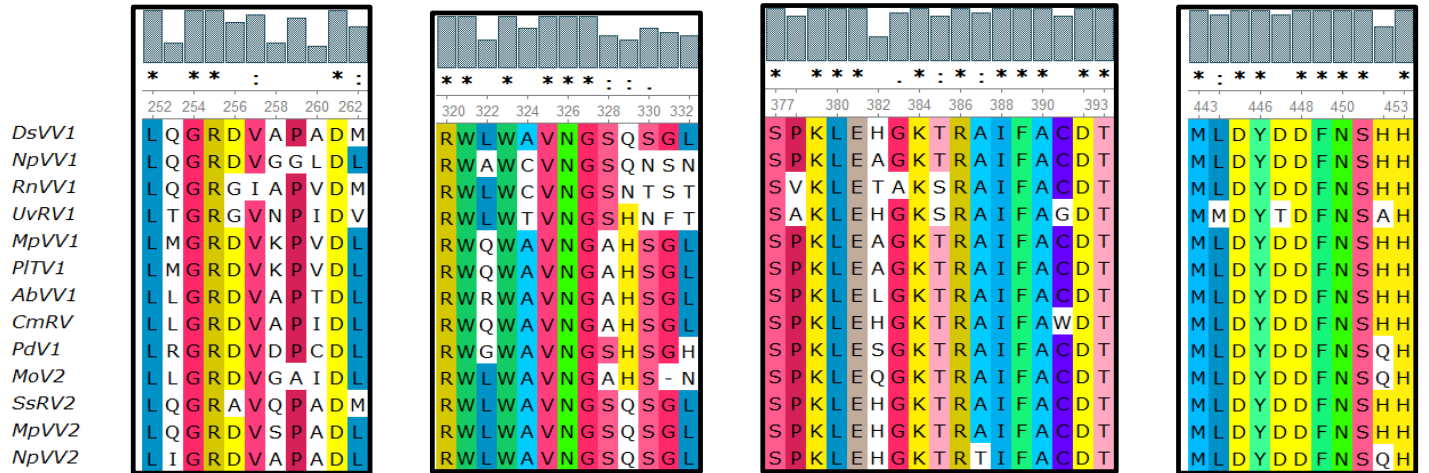

Motif V

Motif VI

Motif VII

Motif VIII

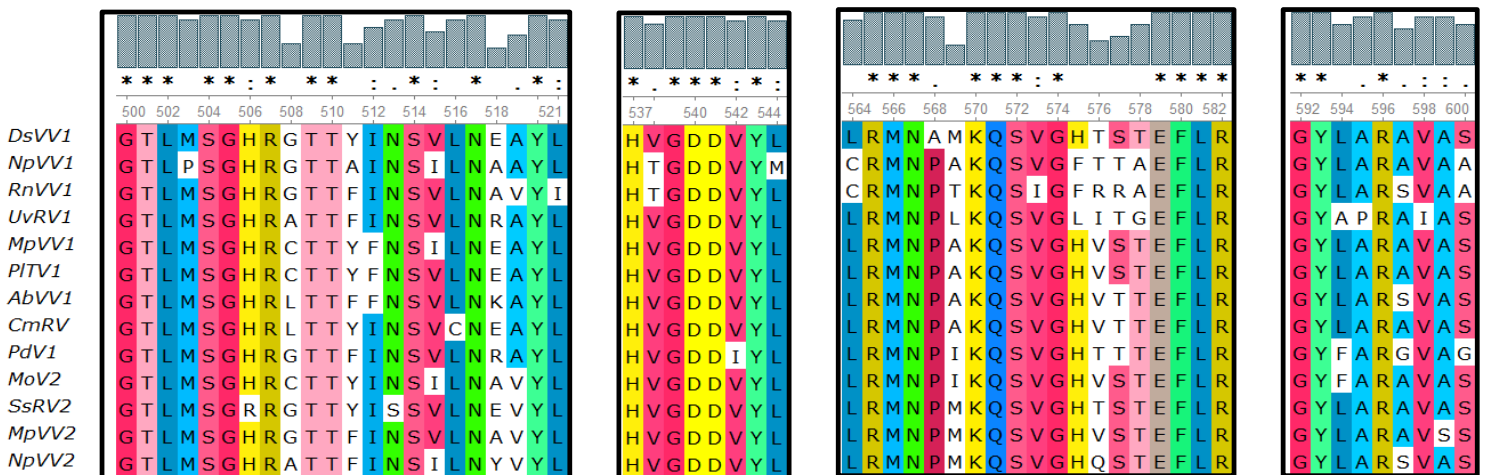



Fig. S6

### DsSpV1 5' Termini

A

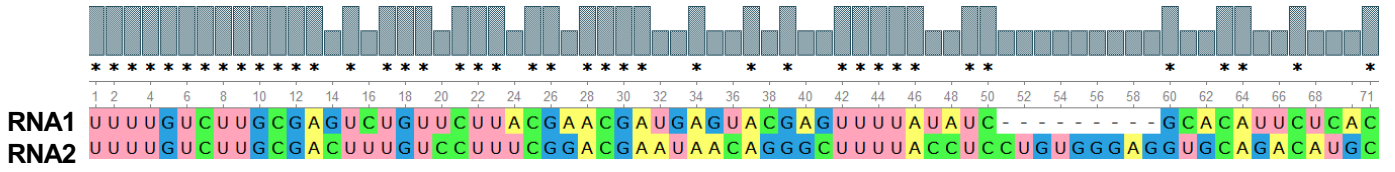

### DsSpV1 3' Termini

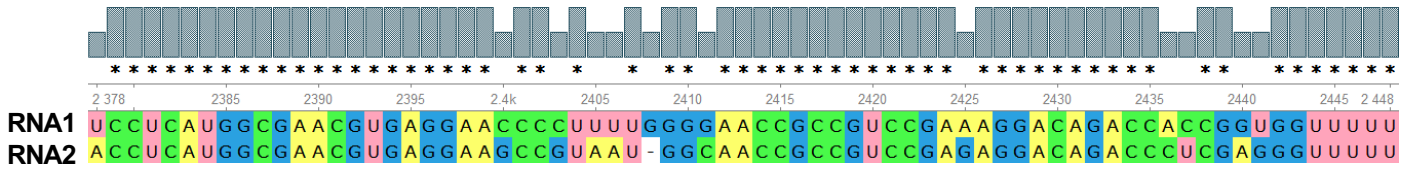

B

#### Motif G

#### Motif F

#### IV-Motif A

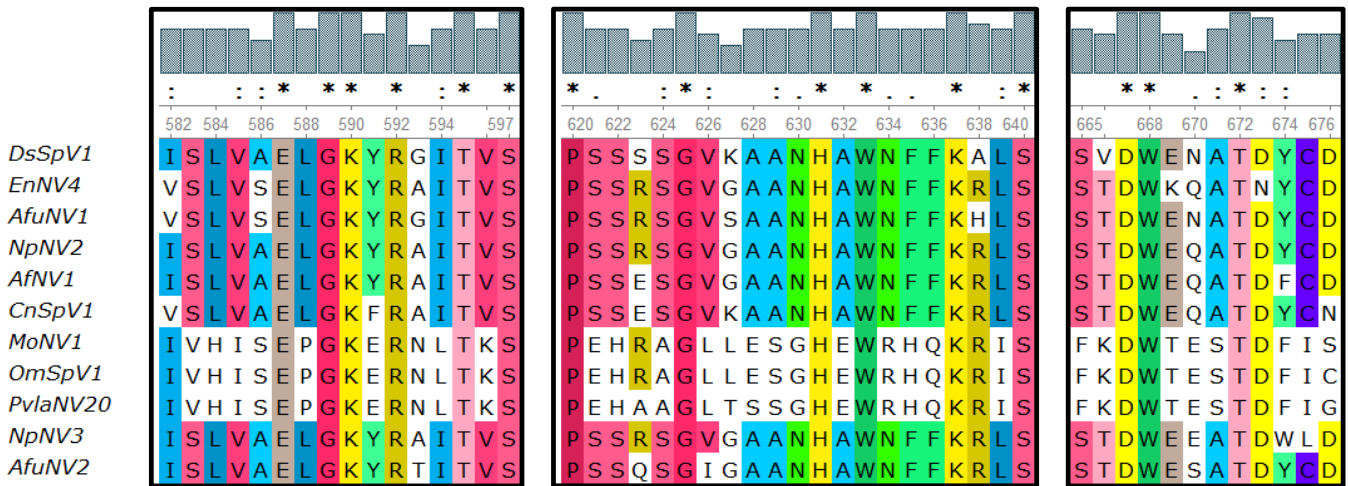

#### V-Motif B

#### VI-Motif C

#### VII-Motif D

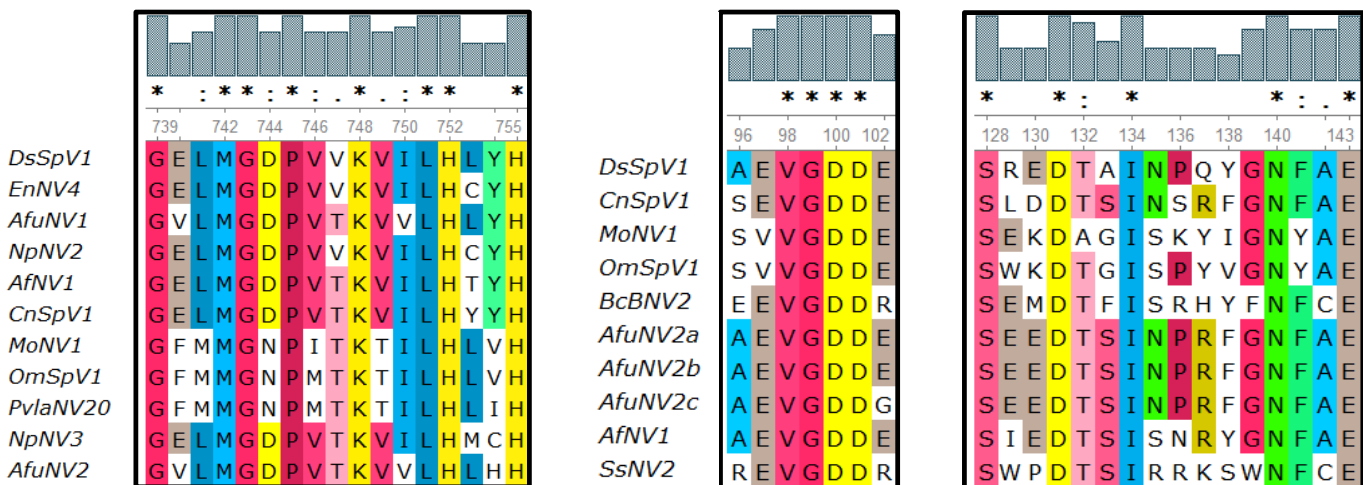

Fig. S7

DsBOV2 5' Termini

A

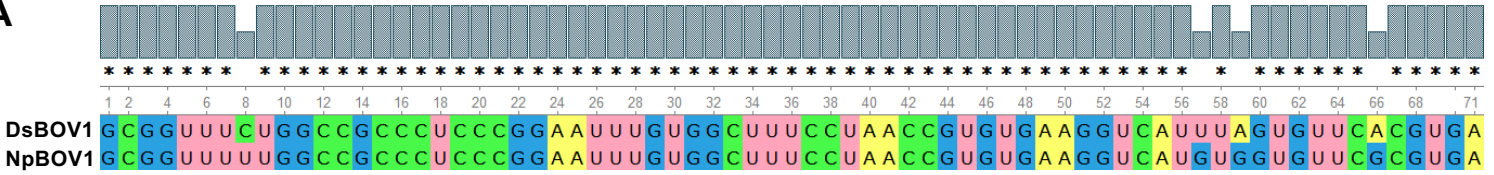

DsBOV2 3' Termini

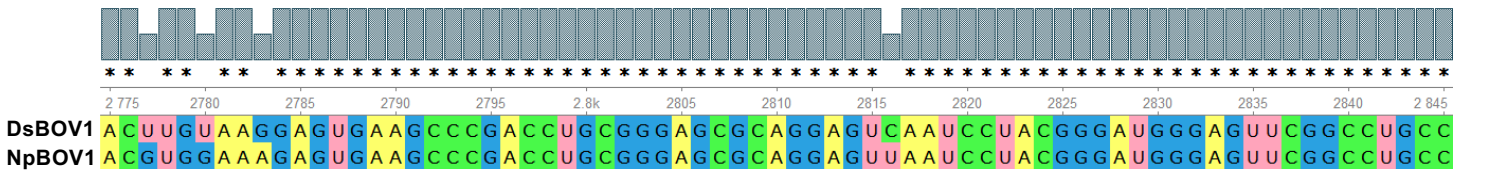

B

Motif I

Motif II

Motif III

Motif IV

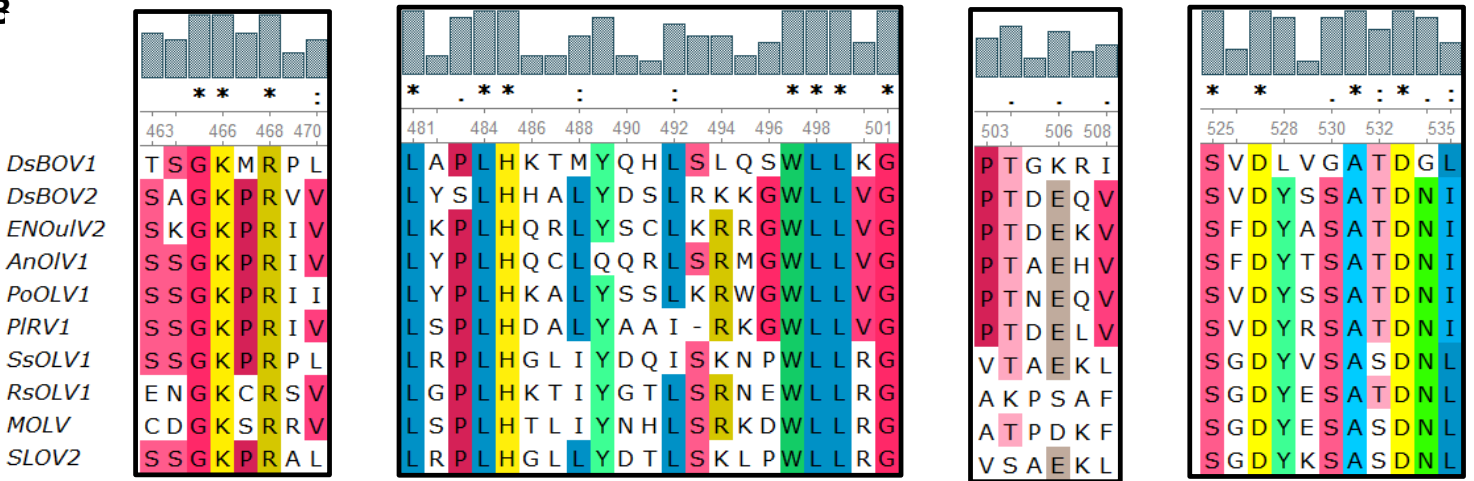

Motif V

Motif VI

Motif VII

Motif VIII

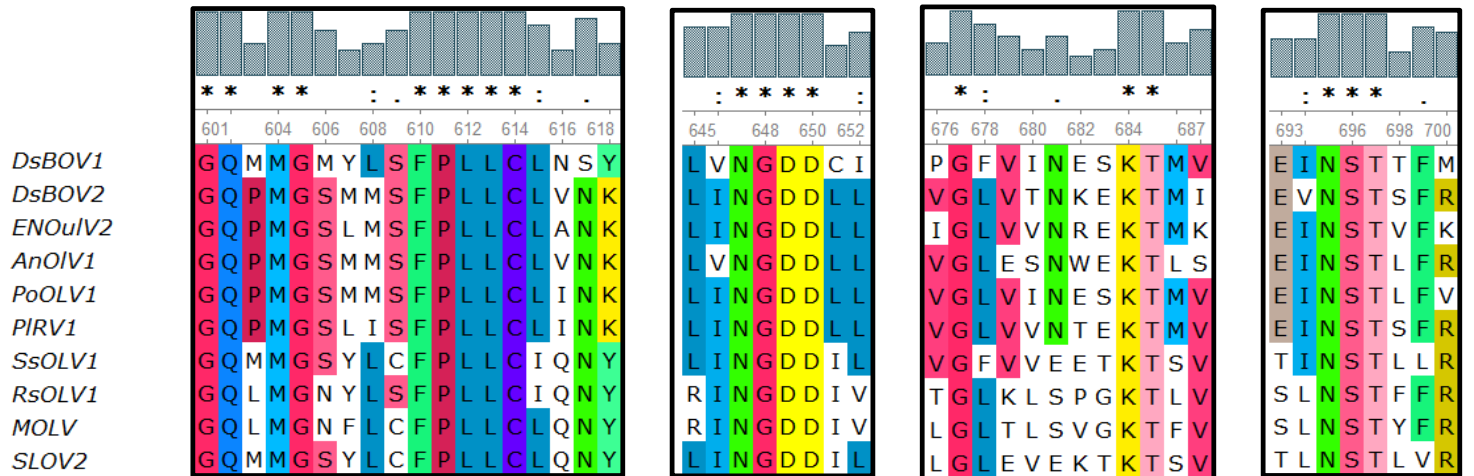

**Fig. S8**

**A**

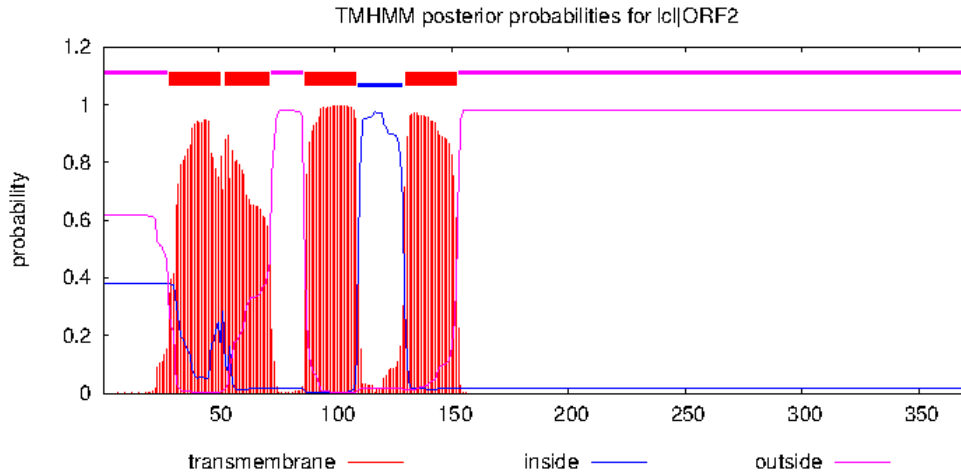

**B**

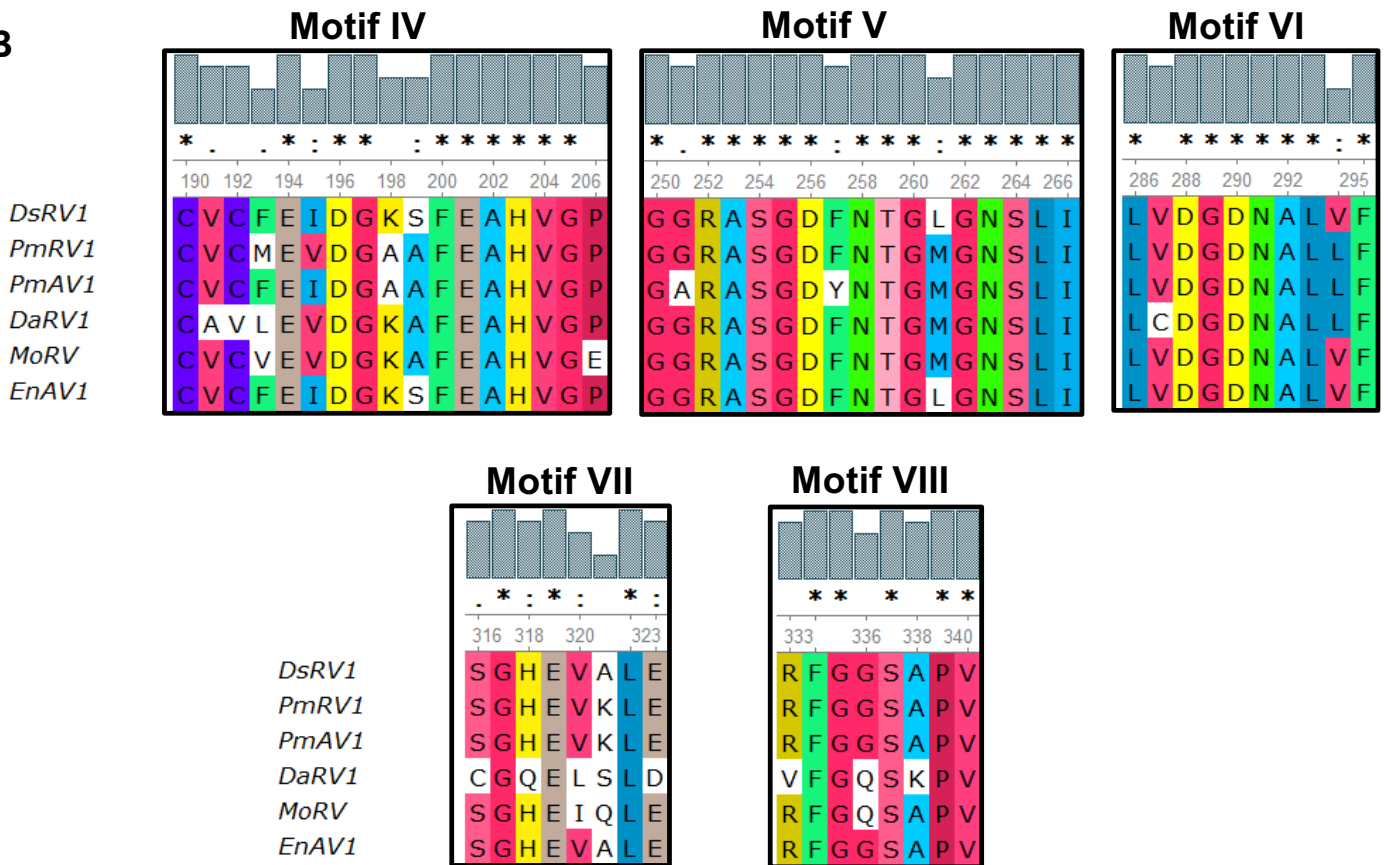

**Supplementary Table S1.** List of primers used in this study.

| <b>Primer name</b> | <b>Primer sequence (5'-3')</b> | <b>Amplicon size (bp)</b> | <b>Purpose</b> |
|--------------------|--------------------------------|---------------------------|----------------|
| contig_73(F)       | AAAGCGATGGTCTCCTACTTCA         | 552                       | RT-PCR         |
| contig_73(R)       | AACGTAGTCTTCAAGCTCCTGA         |                           |                |
| contig_995 (F)     | AATGCGCGGACTGTTCCGTTT          | 505                       | RT-PCR         |
| contig_995 (R)     | GATCAAGGAGGTTGGCTCGAT          |                           |                |
| contig_218 (F)     | AAGGGCACGTATTGGTTCCGAA         | 665                       | RT-PCR         |
| contig_218 (R)     | ACACCTTCGCAGATGTCGTAGT         |                           |                |
| contig_310 (F)     | GAAGTTGGCGACGATGAAGAAG         | 729                       | RT-PCR         |
| contig_310 (R)     | TTCTGCACGAACCTCGAACTC          |                           |                |
| contig_38 (F)      | AAGGTTAGGTCAGACACACTT          | 493                       | RT-PCR         |
| contig_38 (R)      | TCCATACAAGTTGAGGCACACA         |                           |                |
| contig_217 (F)     | TCATGGTTGTTGAAGGGACCTC         | 770                       | RT-PCR         |
| contig_217 (R)     | TAGTCTGGTTCGGCCATAACAG         |                           |                |
| contig_980 (F)     | TTGCACCCGCGTTTCCTTGA           | 754                       | RT-PCR         |
| contig_980 (R)     | GCGCTACCTTGACCATGAGA           |                           |                |
| contig_24 (F)      | GCCAGTAACTTGGTCTTCGCT          | 682                       | RT-PCR         |
| contig_24 (R)      | ACGAGGAAAGGCTCGTTGATC          |                           |                |
| contig_33 (F)      | TCATGGGGACGAACAAGTTGG          | 600                       | RT-PCR         |
| contig_33 (R)      | GGTGCTGCAACAGCCAAGTT           |                           |                |
| Cont175 F          | TTCTCTGCCATCAAATCATCGGA        | 519                       | RT-PCR         |
| Cont175 R          | TCGGA ACTACTGCTTGATGCAATA      |                           |                |
| Cont255 F          | TTACATGGATCTCGTCAACACAGT       | 626                       | RT-PCR         |

|                   |                         |     |          |
|-------------------|-------------------------|-----|----------|
| Cont255 R         | ACCAACCAAGCGACGAGTAAGT  |     |          |
| Cont 70 Chryso F  | ACCAATGATACAGTCGCACGTCA | 579 | RT-PCR   |
| Cont 70 Chryso R  | AGCGCTGACAATTGGTACAGG   |     |          |
| Cont 348 Chryso F | GTTAGTTCGGCTCAGCGACTT   | 535 | RT-PCR   |
| Cont 348 Chryso R | CATCATCATGCCCATCCAGTTC  |     |          |
| Cont 151 Chryso F | ATCACCAGACCGTCTGTACCAT  | 569 | RT-PCR   |
| Cont 151 Chryso R | GTATCATCATCATCAGCTGAGGC |     |          |
| Cont 965 polymy F | TGCTATCACCGTGGTGTCTCT   | 563 | RT-PCR   |
| Cont 965 polymy R | CTGTGTATTTCCTCTCGATGCG  |     |          |
| Cont 245 polymy F | AGCGTAAGTACTCTGCCGTCAT  | 587 | RT-PCR   |
| Cont 245 polymy R | GACTCCGTGATCGACAGAATC   |     |          |
| Cont 706 polymy F | TCGAAATGGCCTCCGAACAAAC  | 533 | RT-PCR   |
| Cont 706 polymy R | CGTGAAACGGTAGGATCCATAG  |     |          |
| contig_980 (5P)   | AACCGTTTCTTTGACATGTCCGA | 397 | RLM-RACE |
| contig_980 (3P)   | TCCAGAAGCTCGGTTTCGCT    | 264 | RLM-RACE |
| contig_965 (5P)   | GTAGAGAGGATGTATATTGCGG  | 834 | RLM-RACE |
| contig_965 (3P)   | AGGATTGCCCTCGTGTGAA     | 417 | RLM-RACE |
| contig_245 (5P)   | ATTGTCCTCGAGGGTTGTTAGT  | 561 | RLM-RACE |
| contig_245 (3P)   | GCTGCCGACGTTGAGGGTCTG   | 391 | RLM-RACE |
| contig_706 (5P)   | CGTACGTGGCGTGGTATTGA    | 357 | RLM-RACE |
| contig_706 (3P)   | GCATCACCCGCATCAAAGGAA   | 411 | RLM-RACE |
| contig_24 (5P)    | GGCGGTATAGTGTGTGTCCAT   | 714 | RLM-RACE |
| contig_24 (3P)    | TTCTACTGCGACAACGTTTTGG  | 654 | RLM-RACE |
| contig 33 (5P)    | CCAAC TTGTTCTGCCCATGA   | 300 | RLM-RACE |
| contig 33 (3P)    | TCGGCCCAAACAGCTGAAACT   | 500 | RLM-RACE |

|                 |                         |     |          |
|-----------------|-------------------------|-----|----------|
| contig_73(5P)   | TAAGGACGTCCGCTTTGGTG    | 469 | RLM-RACE |
| contig_73(3P)   | GGAGCTTGAAGACTACGTTCG   | 379 | RLM-RACE |
| contig_995 (5P) | CAACCTCGTAGAAGATCGACC   | 487 | RLM-RACE |
| contig_995 (3P) | ATCCTGGGTGACGTAAAGAGAA  | 403 | RLM-RACE |
| contig_218 (5P) | CCATATGTTTTCTGCATTCCAGC | 448 | RLM-RACE |
| contig_218 (3P) | AGGTATACCTGTTCTCCGTTGA  | 406 | RLM-RACE |
| contig_310 (5P) | GGGTTTATCGCAGTATCTTCTC  | 462 | RLM-RACE |
| contig_310 (3P) | GTTATGCCGTGAGGCAAACCTT  | 464 | RLM-RACE |
| contig_38 (5P)  | ATCCGAAGACATACTTGCGTAAG | 539 | RLM-RACE |
| contig_38 (3P)  | AAGTGAGTGGAATACGCAGTCAT | 443 | RLM-RACE |
| contig_217 (5P) | TTACACGTAAGGTTAGGGATCG  | 464 | RLM-RACE |
| contig_217 (3P) | AAAGAAAAGAGAGTGGTTGGCG  | 512 | RLM-RACE |
